# Supplementary material for: Tropomyosin Receptor Antagonism in Cylindromatosis (TRAC), an early phase trial of a topical tropomyosin kinase inhibitor as a treatment for inherited CYLD defective skin tumours: study protocol for a randomised controlled trial
Source: PubMed Central journal article supplement (PMC5341402; doi:10.1186/s13063-017-1812-z), 2017-03-07
Supplement: 13063_2017_1812_MOESM1_ESM.pdf [file 13063_2017_1812_MOESM1_ESM.pdf]

## Additional file 1

| <b>Score</b> | <b>Grade</b>             | <b>Definition</b>                                                                     |
|--------------|--------------------------|---------------------------------------------------------------------------------------|
| 0            | Clear                    | Normal skin surface                                                                   |
| 1            | Almost clear             | Just perceptible erythema and just perceptible papulation/infiltration                |
| 2            | Mild inflammation        | Mild erythema and mild papulation/infiltration                                        |
| 3            | Moderate inflammation    | Moderate erythema and moderate papulation/infiltration                                |
| 4            | Severe inflammation      | Severe erythema and severe papulation/infiltration                                    |
| 5            | Very severe inflammation | Severe erythema and severe papulation/infiltration with oozing/crusting or ulceration |
