# Supplementary material for: Tropomyosin Receptor Antagonism in Cylindromatosis (TRAC), an early phase trial of a topical tropomyosin kinase inhibitor as a treatment for inherited CYLD defective skin tumours: study protocol for a randomised controlled trial
Source: PubMed Central journal article supplement (PMC5341402; doi:10.1186/s13063-017-1812-z), 2017-03-07

## Additional file 3

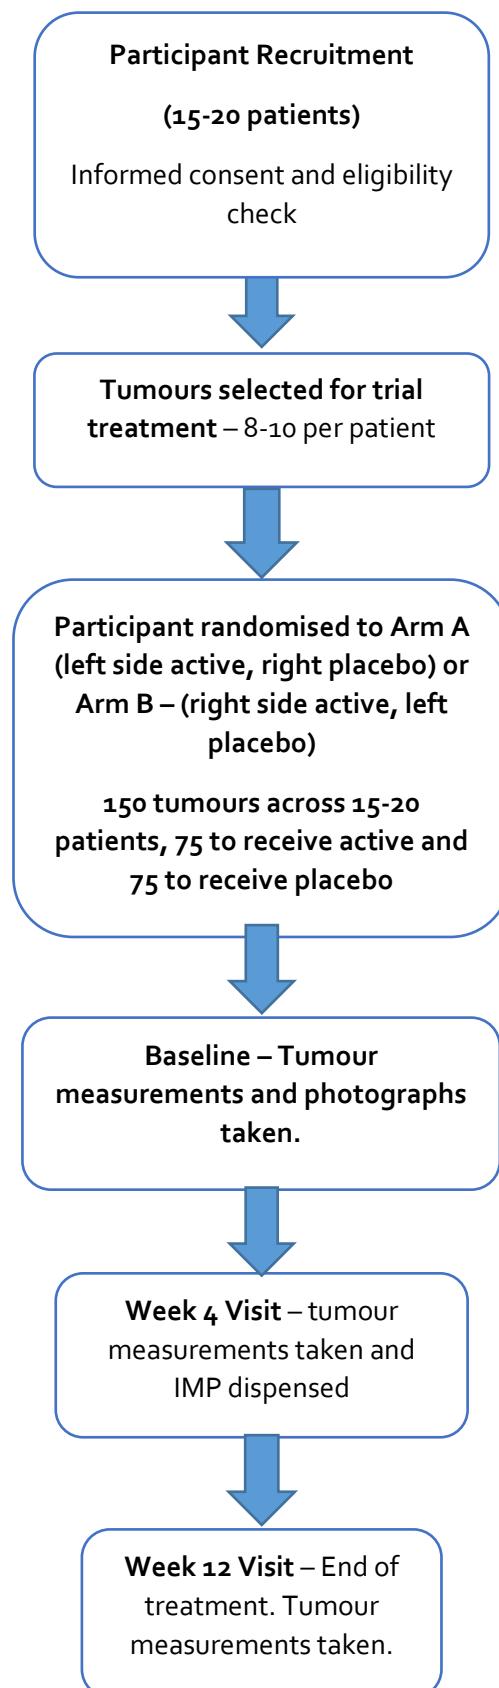

Supplement: 13063_2017_1812_MOESM3_ESM.pdf [file 13063_2017_1812_MOESM3_ESM.pdf]
