# Supplementary material for: Tropomyosin Receptor Antagonism in Cylindromatosis (TRAC), an early phase trial of a topical tropomyosin kinase inhibitor as a treatment for inherited CYLD defective skin tumours: study protocol for a randomised controlled trial
Source: PubMed Central journal article supplement (PMC5341402; doi:10.1186/s13063-017-1812-z), 2017-03-07
Supplement: 13063_2017_1812_MOESM5_ESM.pdf [file 13063_2017_1812_MOESM5_ESM.pdf]

## Additional file 5

| Time                                     | Visit 1<br>Pre-Screening | Visit 2<br>Baseline visit<br>Confirmation of<br>eligibility |   |   | Visit 3a<br>Week 4 EoT | Visit 3b<br>Surgery  |
|------------------------------------------|--------------------------|-------------------------------------------------------------|---|---|------------------------|----------------------|
|                                          | —                        | Week 0                                                      |   |   | 28 days<br>(+3 days)   | 28 days<br>(+3 days) |
| Trial Discussed / PIS given <sup>1</sup> | X                        |                                                             |   |   |                        |                      |
| Informed Consent <sup>2</sup>            |                          | X                                                           |   |   |                        |                      |
| Photography                              |                          |                                                             |   | X |                        |                      |
| Medical History and demographics         |                          |                                                             | X |   |                        |                      |
| EQ5D                                     |                          |                                                             | X |   |                        |                      |
| DLQI                                     |                          |                                                             | X |   |                        |                      |
| Patient treatment questionnaire          |                          |                                                             |   |   | X                      |                      |
| Pregnancy Test <sup>3</sup>              |                          |                                                             |   | X | X                      |                      |
| Trial medication dispensed               |                          |                                                             |   | X |                        |                      |
| Trial medication returned                |                          |                                                             |   |   | X                      |                      |
| Patient diary                            |                          |                                                             |   | X | X                      |                      |
| Lesion Excision                          |                          |                                                             |   |   |                        | X                    |
| Adverse events                           |                          |                                                             |   |   | X                      |                      |
| Concomitant medications                  |                          |                                                             | X |   | X                      |                      |
| CRF completion                           |                          |                                                             |   | X | X                      |                      |

<sup>1</sup> Patient information sheet can be post to avoid any unnecessary journey.

<sup>2</sup> A minimum of 24hr for review of patient information sheet before patient can sign informed consent form.

<sup>3</sup> Pregnancy test should be urine dipstick and for all women of childbearing potential.
