# Supplementary material for: Tropomyosin Receptor Antagonism in Cylindromatosis (TRAC), an early phase trial of a topical tropomyosin kinase inhibitor as a treatment for inherited CYLD defective skin tumours: study protocol for a randomised controlled trial
Source: PubMed Central journal article supplement (PMC5341402; doi:10.1186/s13063-017-1812-z), 2017-03-07
Supplement: 13063_2017_1812_MOESM6_ESM.pdf [file 13063_2017_1812_MOESM6_ESM.pdf]

## Additional file 6

| Time                                     | Visit 1<br>Pre-Screening | Visit 2<br>Baseline visit<br>Confirmation of eligibility & Randomisation |   |   | Telephone call | Visit 3<br>Week 4<br>Treatment Visit | Telephone call | Visit 4<br>Week 12<br>EoT | Telephone call       |
|------------------------------------------|--------------------------|--------------------------------------------------------------------------|---|---|----------------|--------------------------------------|----------------|---------------------------|----------------------|
|                                          | Week -1                  | Week 0                                                                   |   |   | Week 2         | Post Week 4                          | Week 6         | Post week 12              | 4 weeks post visit 4 |
| Trial Discussed / PIS given <sup>1</sup> | X                        |                                                                          |   |   |                |                                      |                |                           |                      |
| Informed Consent <sup>2</sup>            |                          | X                                                                        |   |   |                |                                      |                |                           |                      |
| Photography                              |                          |                                                                          |   | X |                |                                      |                |                           |                      |
| Medical History and demographics         |                          |                                                                          | X |   |                |                                      |                |                           |                      |
| EQ5D <sup>3</sup>                        |                          |                                                                          | X |   |                |                                      |                |                           |                      |
| DLQI <sup>3</sup>                        |                          |                                                                          | X |   |                |                                      |                |                           |                      |
| Patient treatment questionnaire          |                          |                                                                          |   |   |                |                                      | X              |                           |                      |
| Compliance assessment                    |                          |                                                                          |   |   | X              |                                      | X              |                           |                      |
| Volume measurement                       |                          |                                                                          |   | X |                | X                                    |                | X                         |                      |
| Tumour Pain Assessment                   |                          |                                                                          |   | X |                | X                                    |                | X                         |                      |
| Pregnancy Test <sup>4</sup>              |                          |                                                                          | X |   |                | X                                    |                | X                         |                      |
| Blood sample                             |                          |                                                                          |   |   |                |                                      |                | X                         |                      |
| Trial medication dispensed               |                          |                                                                          |   | X |                | X                                    |                |                           |                      |
| Trial medication returned                |                          |                                                                          |   |   |                | X                                    |                | X                         |                      |
| Patient Diary                            |                          |                                                                          |   | X |                | X                                    |                | X                         |                      |

|                         |  |  |   |   |  |   |  |   |   |
|-------------------------|--|--|---|---|--|---|--|---|---|
| Lesions biopsied        |  |  |   |   |  |   |  | X |   |
| Adverse events          |  |  |   |   |  | X |  | X | X |
| Concomitant medications |  |  | X |   |  | X |  | X |   |
| CRF completion          |  |  |   | X |  | X |  | X | X |

<sup>1</sup> Patient information sheet can be post to avoid any unnecessary journey.

<sup>2</sup> A minimum of 24hr for review of patient information sheet before patient can sign informed consent form.

<sup>3</sup> QoL only to be completed if patient was not part of the cohort 1 trial.

<sup>4</sup>Pregnancy test should be urine dipstick and for all women of childbearing potential.
